# Supplementary material
Source: PubMed Central journal article supplement (PMC9014274)
Supplement: NIHMS1796719-supplement-Supplementary_Table.pdf [file NIHMS1796719-supplement-Supplementary_Table.pdf]

## Supplementary Table

| Compound                              | EIM         | Study design                                                     | Study population                       | Outcome                                                        |                                                                                                                                                                                                                                                                         |
|---------------------------------------|-------------|------------------------------------------------------------------|----------------------------------------|----------------------------------------------------------------|-------------------------------------------------------------------------------------------------------------------------------------------------------------------------------------------------------------------------------------------------------------------------|
| <b>Anti-TNF</b>                       |             |                                                                  |                                        |                                                                |                                                                                                                                                                                                                                                                         |
| Brooklyn et al 2006 <sup>1</sup>      | Infliximab  | PG                                                               | RCT, 2 weeks                           | 30 patients (19 with IBD, 13 CD, 6 UC)                         | Clinical improvement in 46 vs. 6%                                                                                                                                                                                                                                       |
| Kaufmann et al 2005 <sup>2</sup>      | Infliximab  | Arthritis<br>Arthralgia<br>Inflammatory back pain<br>PG          | Open-label, 2 weeks                    | 22 CD, 1 UC                                                    | Clinical remission of arthritis in 33% (1/3), clinical improvement of arthralgia in 63.6% (7/11), improvement of inflammatory back pain in 63.6% (7/11), and improvement of PG in 100% (4/4). In 1 patient, clinical remission of PG was achieved                       |
| Brooklyn et al 2006 <sup>1</sup>      | Infliximab  | PG                                                               | Open-label, 4 weeks (extension of RCT) | 29 patients                                                    | Clinical improvement of PG in 69% and remission in 21%                                                                                                                                                                                                                  |
| Rispo et al 2005 <sup>3</sup>         | Infliximab  | Arthritis<br>Arthralgia<br>Cutaneous EIM<br>Uveitis              | Open-label, 10 weeks                   | 15 CD                                                          | Improvement rates of 60-80% (arthritis), and remission rates of 100% (arthralgia 6/6, cutaneous manifestations, 4/4 and uveitis, 2/2)                                                                                                                                   |
| Herfarth et al 2002 <sup>4</sup>      | Infliximab  | Arthritis, inflammatory arthralgia                               | Open-label, 12 weeks                   | 59 CD                                                          | Improvement and remission rates for arthritis/inflammatory arthralgia of 36/59 (61%) and 27/59 (46%), respectively                                                                                                                                                      |
| Generini et al. 2004 <sup>5</sup>     | Infliximab  | Arthritis                                                        | Open-label, 6 months                   | 24 CD                                                          | Decreasing prevalence rates from 58 down to 12.5%                                                                                                                                                                                                                       |
| Löfberg et al 2012 <sup>6</sup>       | Adalimumab  | Arthralgia<br>Arthritis<br>Sacroiliitis<br>EN                    | Open-label, 20 weeks                   | 945 CD                                                         | Decreasing frequency for most EIM compared to baseline: arthralgia 47.1 vs. 26.8%, arthritis 8.7 vs. 2.1%, sacroiliitis 3.6 vs. 1.9%, and EN 2.4 vs. 0.4%.                                                                                                              |
| Barreiro-de-Acosta et al <sup>7</sup> | Adalimumab  | Arthritis<br>Ankylosing spondylitis<br>Uveitis<br>PG             | Open-label, 6 months                   | 42 CD                                                          | Improvement/remission rates of 61% (arthritis, n=7) and 100% (ankylosing spondylitis, n=1, uveitis, n=1 and PG, n=2).                                                                                                                                                   |
| <b>Anti-integrins</b>                 |             |                                                                  |                                        |                                                                |                                                                                                                                                                                                                                                                         |
| Phillips et al 2020 <sup>8</sup>      | Vedolizumab | PG<br>EN                                                         | Case series                            | 5 cases                                                        | PG with Non-response 1/1 (PG), EN with response in 50% (2/4).                                                                                                                                                                                                           |
| Tadbiri et al 2018 <sup>9</sup>       | Vedolizumab | Arthritis<br>Inflammatory arthralgia<br>Cutaneous manifestations | Observational cohort, 54 weeks         | 49 IBD                                                         | Clinical remission rates were 44.7% for arthritis/inflammatory arthralgia (n=47) and 75% for cutaneous manifestations (n=4).                                                                                                                                            |
| Feagan et al 2019 <sup>10</sup>       | Vedolizumab | Arthritis<br>Arthralgia<br>EN<br>PG<br>Uveitis                   | RCT (post-hoc), 52 weeks               | 273 UC (GEMINI I)<br>553 CD (GEMINI II)<br>288 CD (GEMINI III) | Vedolizumab-treated CD patients were less likely to show new or worsening arthritis/arthralgia compared to placebo (HR 0.63). Sustained resolution rates between for arthritis/arthralgia were not significantly different from placebo (GEMINI trial III 22% vs. 16%). |
| <b>JAK-inhibitors</b>                 |             |                                                                  |                                        |                                                                |                                                                                                                                                                                                                                                                         |
| Rubin et al 2020 <sup>11</sup>        | Tofacitinib | Arthritis                                                        | RCT (post hoc), 52 weeks               | 1139 (OCTAVE I and II)<br>592 (OCTAVE Sustain)                 | Improvement of arthritis in 16.7% (1/6, 5mg bid) and 33.3% (1/3, 10mg bid), whereas worsening of symptoms was reported with placebo in 18.2% (2/11).                                                                                                                    |

|                                  |             |          |             |         |                                                                                          |
|----------------------------------|-------------|----------|-------------|---------|------------------------------------------------------------------------------------------|
| Kochar et al 2018 <sup>12</sup>  | Tofacitinib | PG       | Case series | 3 CD    | Improvement of PG in 3 patients                                                          |
| Anti-IL12/23                     |             |          |             |         |                                                                                          |
| Philipps et al 2020 <sup>8</sup> | Ustekinumab | PG<br>EN | Case series | 8 cases | PG with remission in 100% (3/3), EN with remission in 80% (4/5, 1 patient with response) |

Supplementary Table: Main prospective studies and case series for biologic and small molecule treatment for extraintestinal manifestations of inflammatory bowel diseases. All these studies were performed to specifically look at treatment of IBD-related EIM. CD, Crohn's disease; EIM, extraintestinal manifestation; EN, erythema nodosum; IBD, inflammatory bowel disease; PG, pyoderma gangrenosum; RCT, randomized-controlled trial; UC, ulcerative colitis

**REFERENCES**

1. Brooklyn TN, Dunnill MG, Shetty A, et al. Infliximab for the treatment of pyoderma gangrenosum: a randomised, double blind, placebo controlled trial. *Gut*. 2006;55(4):505-509.
2. Kaufman I, Caspi D, Yeshurun D, Dotan I, Yaron M, Elkayam O. The effect of infliximab on extraintestinal manifestations of Crohn's disease. *Rheumatol Int*. 2005;25(6):406-410.
3. Rispo A, Scarpa R, Di Girolamo E, et al. Infliximab in the treatment of extra-intestinal manifestations of Crohn's disease. *Scand J Rheumatol*. 2005;34(5):387-391.
4. Herfarth H, Obermeier F, Andus T, et al. Improvement of arthritis and arthralgia after treatment with infliximab (Remicade) in a German prospective, open-label, multicenter trial in refractory Crohn's disease. *Am J Gastroenterol*. 2002;97(10):2688-2690.
5. Generini S, Giacomelli R, Fedi R, et al. Infliximab in spondyloarthritis associated with Crohn's disease: an open study on the efficacy of inducing and maintaining remission of musculoskeletal and gut manifestations. *Ann Rheum Dis*. 2004;63(12):1664-1669.
6. Löfberg R, Louis EV, Reinisch W, et al. Adalimumab produces clinical remission and reduces extraintestinal manifestations in Crohn's disease: results from CARE. *Inflamm Bowel Dis*. 2012;18(1):1-9.
7. Barreiro-de-Acosta M, Lorenzo A, Domínguez-Muñoz JE. Efficacy of adalimumab for the treatment of extraintestinal manifestations of Crohn's disease. *Rev Esp Enferm Dig*. 2012;104(9):468-472.
8. Phillips FM, Verstockt B, Sebastian S, et al. Inflammatory cutaneous lesions in inflammatory bowel disease treated with Vedolizumab or Ustekinumab: an ECCO CONFER multicentre case series. *J Crohns Colitis*. 2020.
9. Tadbiri S, Peyrin-Biroulet L, Serrero M, et al. Impact of vedolizumab therapy on extra-intestinal manifestations in patients with inflammatory bowel disease: a multicentre cohort study nested in the OBSERV-IBD cohort. *Alimentary pharmacology & therapeutics*. 2018;47(4):485-493.
10. Feagan BG, Sandborn WJ, Colombel JF, et al. Incidence of Arthritis/Arthralgia in Inflammatory Bowel Disease with Long-term Vedolizumab Treatment: Post Hoc Analyses of the GEMINI Trials. *J Crohns Colitis*. 2019;13(1):50-57.
11. Rubin DT, Reinisch W, Greuter T, et al. THE EFFECT OF TOFACITINIB ON EXTRAINTESTINAL MANIFESTATIONS AT BASELINE IN PATIENTS WITH MODERATE TO SEVERE ULCERATIVE COLITIS IN THE OCTAVE PROGRAM. *Gastroenterology*. 2020;158(6):S1195-96.
12. Kochar B, Herfarth N, Mamie C, Navarini AA, Scharl M, Herfarth HH. Tofacitinib for the Treatment of Pyoderma Gangrenosum. *Clin Gastroenterol Hepatol*. 2018.
