# Supplementary material
Source: PubMed Central journal article supplement (PMC9014274)

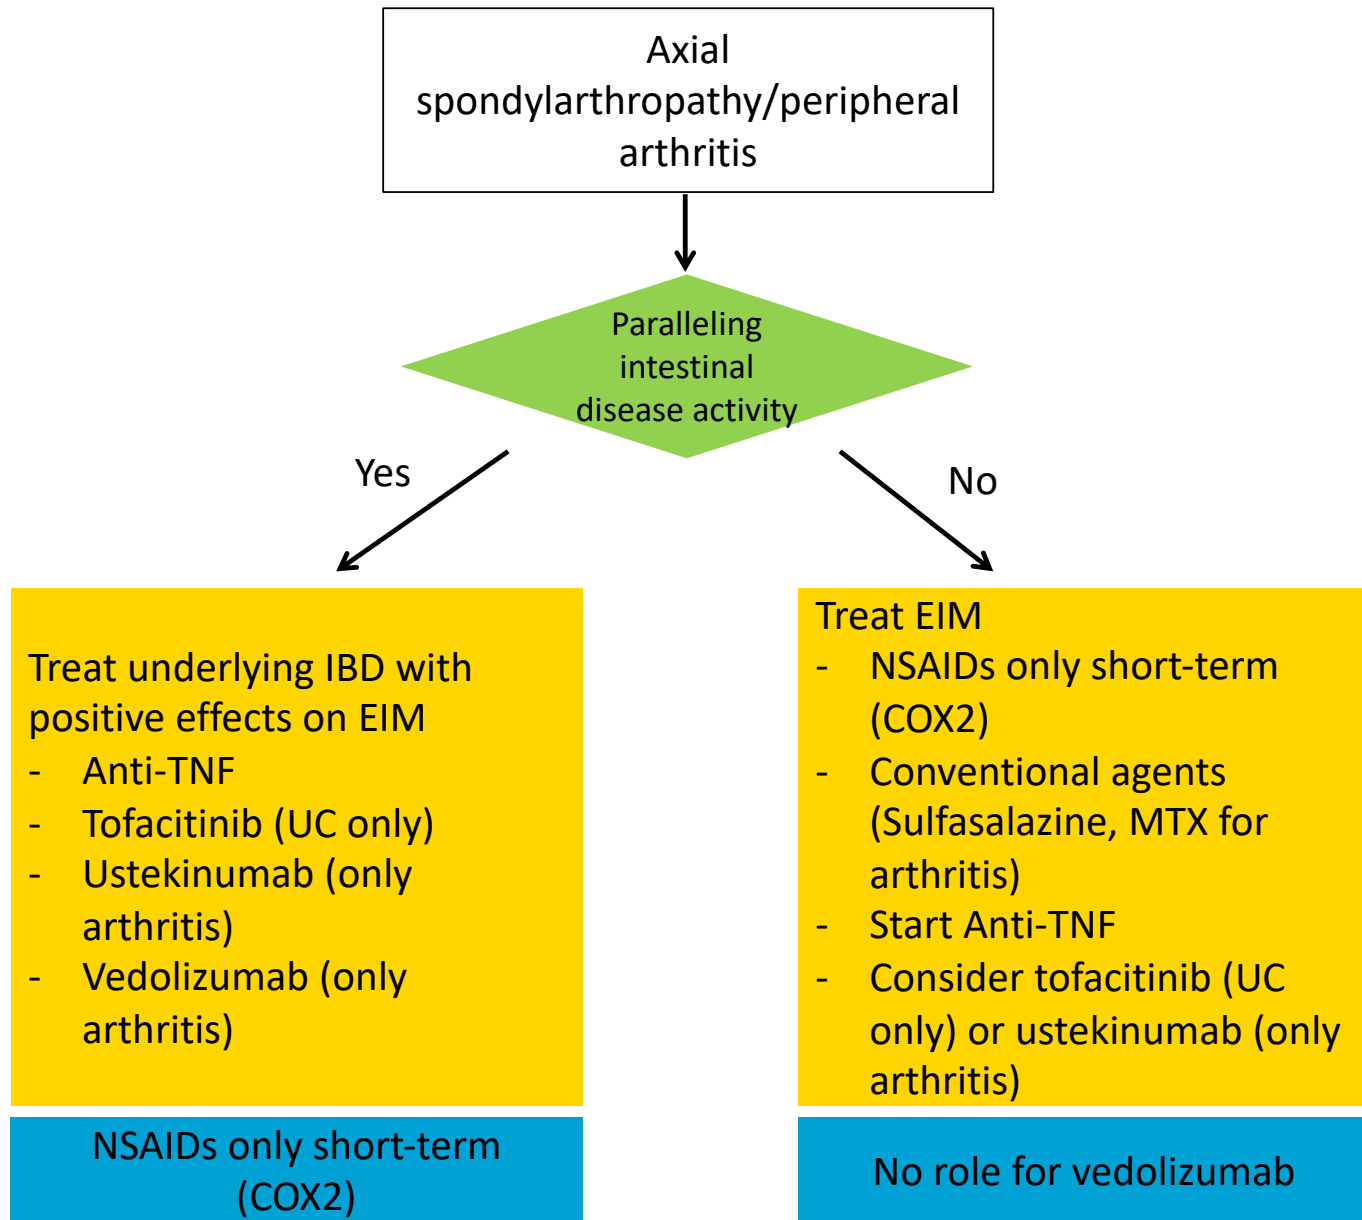

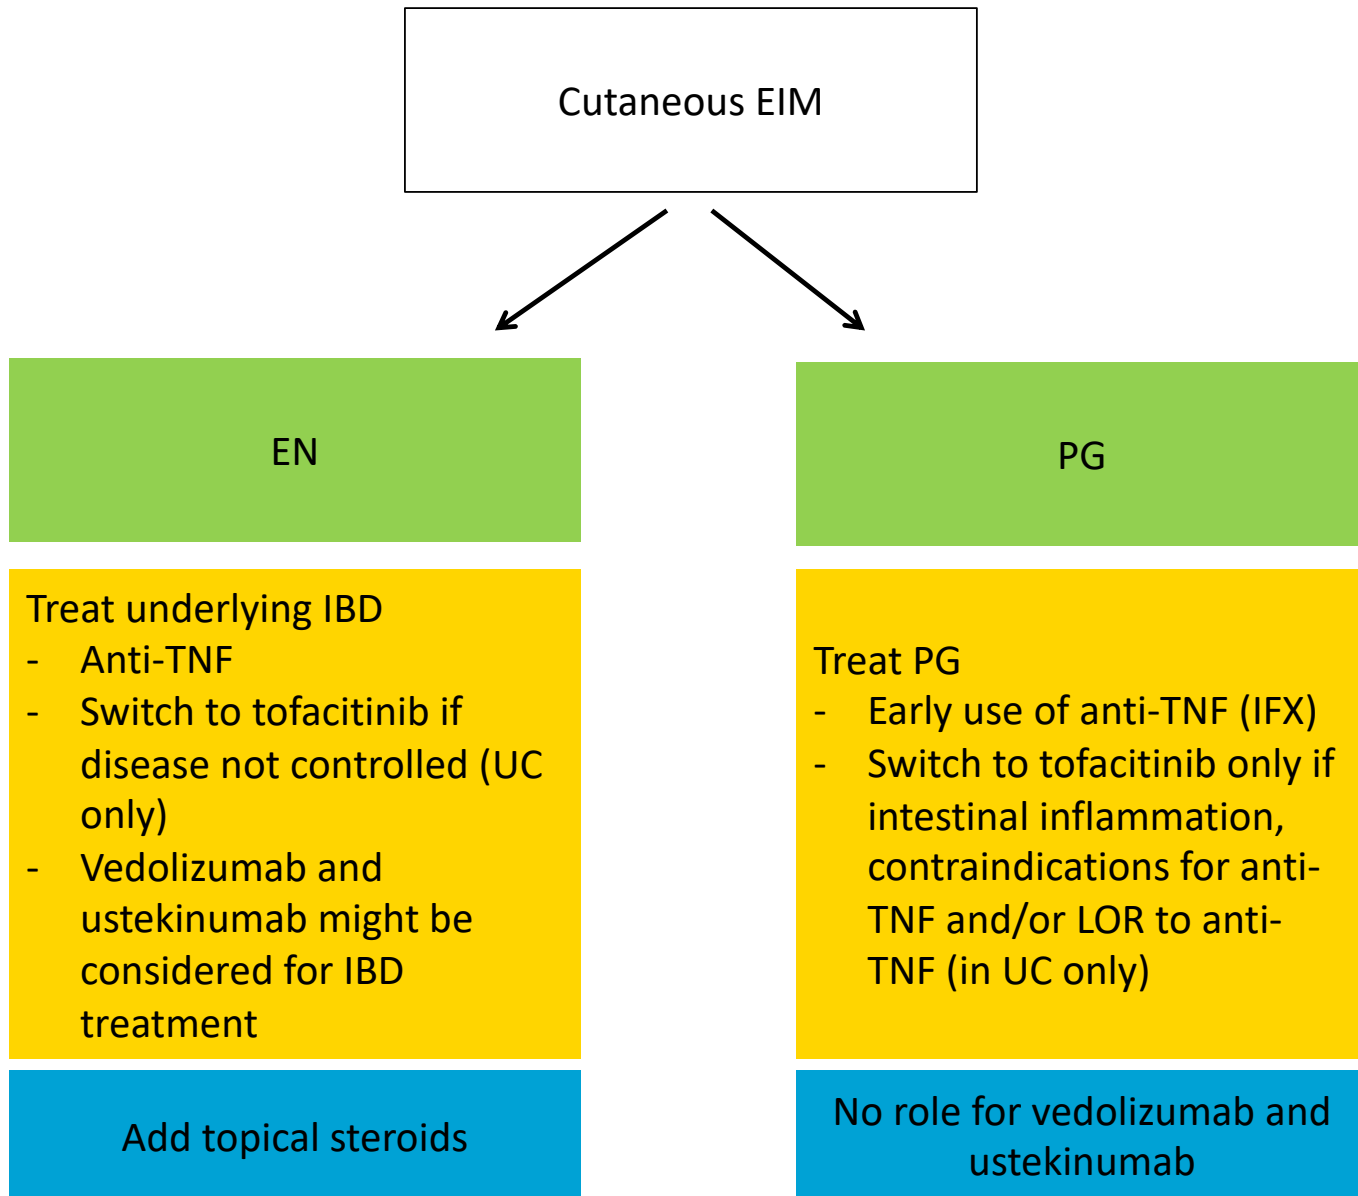

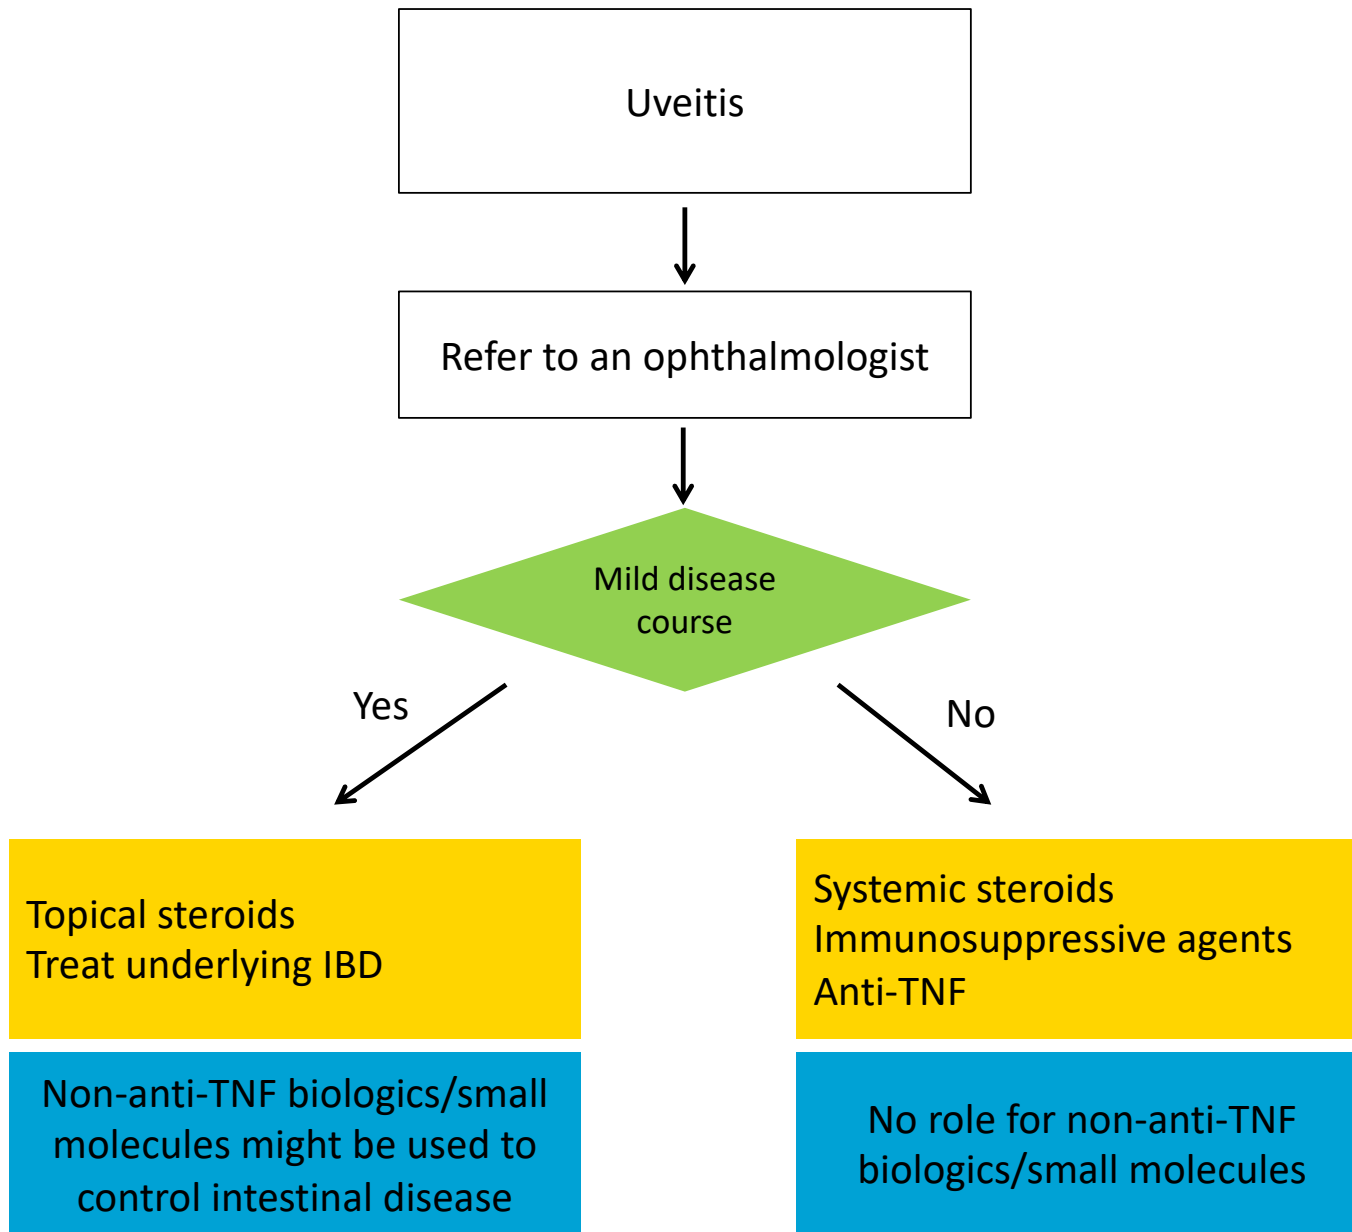

Supplement: NIHMS1796719-supplement-Supplementary_Figures.pdf [file NIHMS1796719-supplement-Supplementary_Figures.pdf]
